# Supplementary material for: Electrical percolation characteristics of metallic single-walled carbon nanotube networks by vacancy evolution
Source: Royal Society of Chemistry journal article supplement (doi:10.1039/c4cp02337d), 2014-07-14
Supplement: c4cp02337d1.pdf [file c4cp02337d1.pdf]

## Electrical percolation characteristics of metallic single-walled carbon nanotube networks by vacancy evolution

Do-Hyun Kim,\* Jun Eon Jin, Mingxing Piao, Jun Hee Choi and Gyu Tae Kim\*

School of Electrical Engineering, Korea University, Anam-dong, Seongbuk-gu, Seoul 136-713, Korea.

### AFM images

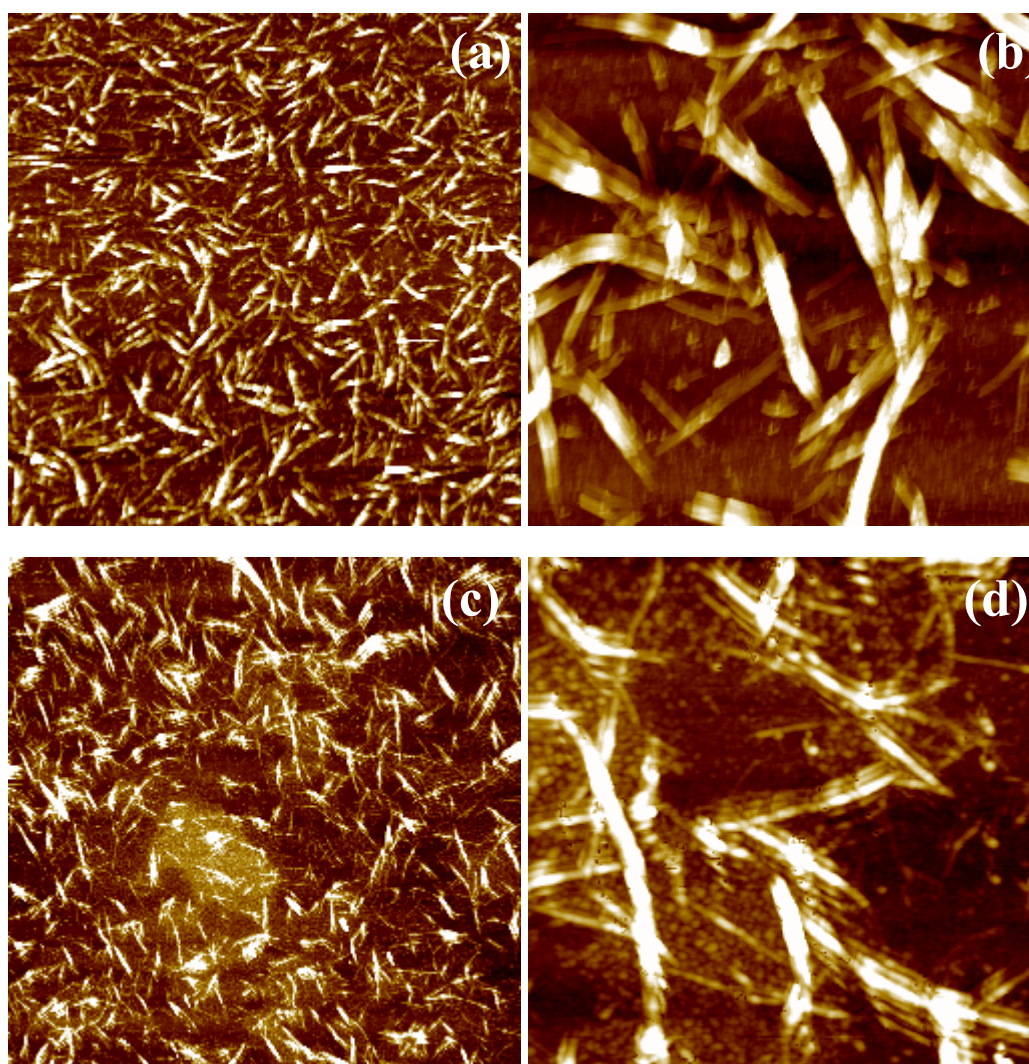

**Fig. S1** AFM images of m-SWCNT networks (a, b) before and (c, d) after developing carbon vacancies by exposing the networks to air at 250 °C for 8 hr in the presence of the catalyst nanoparticles (NPs). The images are 10 μm × 10 μm (a, c) and 2 μm × 2 μm (b, d).

As shown in Fig. S1 (a) and (b), pristine m-SWCNTs are evenly networked between source and drain electrodes on Si substrate in the absence of cobalt oxide catalyst. However, Fig. 1(c) shows that the density of m-SWCNT networks decreased after vacancy evolution by oxidizing the networks in air for 8 hr in the presence of the catalyst. Fig. S1(d) displays that cobalt oxide NPs formed in m-SWCNT networks and Si substrate after vacancy evolution. These results are consistent with the current-voltage measurement of FET, where the source-drain current continuously decreases as the vacancy developed in the networks.
